# Supplementary material for: Activation of Necroptosis by Engineered Self Tumor-Derived Exosomes Loaded with CRISPR/Cas9
Source: PubMed Central journal article supplement (PMC6639591; doi:10.1016/j.omtn.2019.05.032), 2019-07-03
Supplement: mmc1.pdf [file mmc1.pdf]

**OMTN, Volume 17**

**Supplemental Information**

**Activation of  
Necroptosis by  
Engineered Self  
Tumor-Derived  
Exosomes Loaded  
with CRISPR/Cas9**

**Diana Gulei and Ioana Berindan-Neagoe**

**TNFRSF1A and TNF-alpha expression in cancer (TCGA samples)**  
- Compatible expression pattern with the proposal for the receptor (↑), but not for the ligand (↑ or not statistically significant)

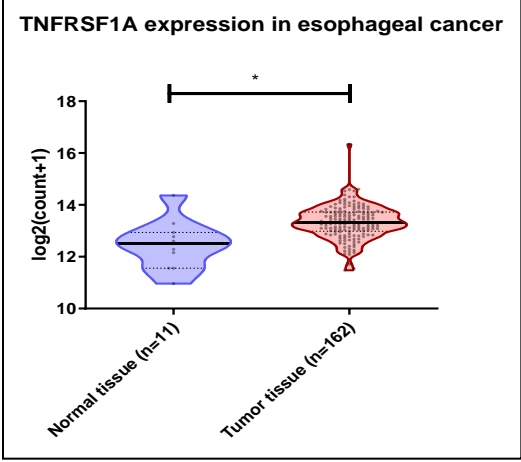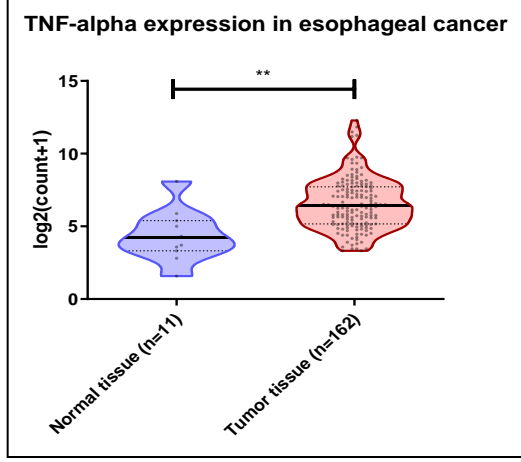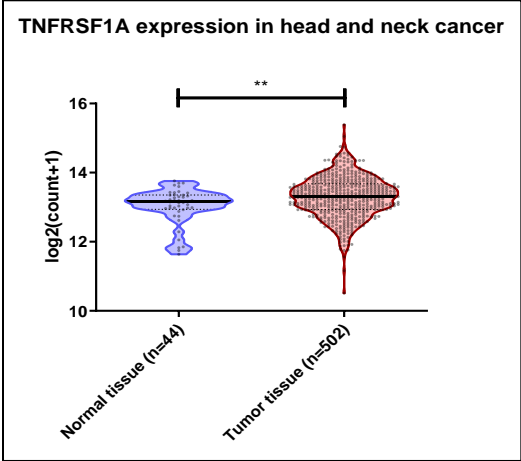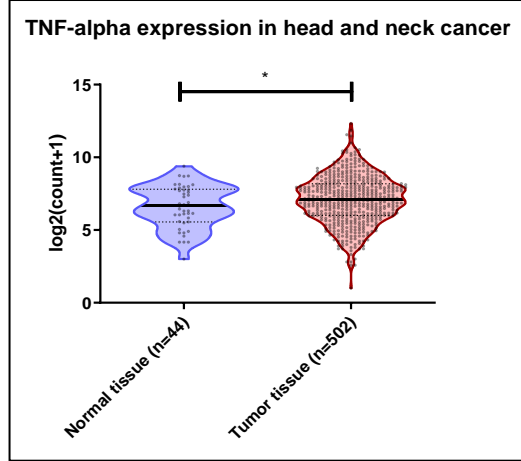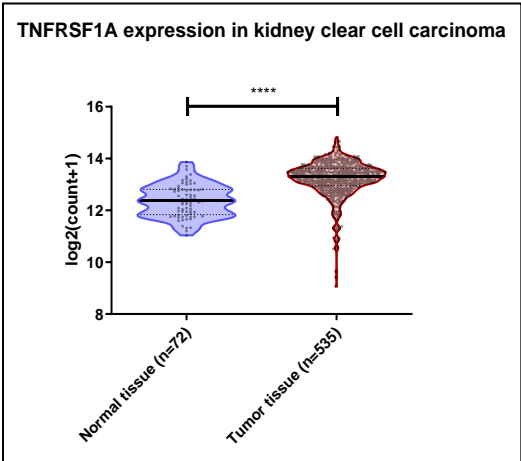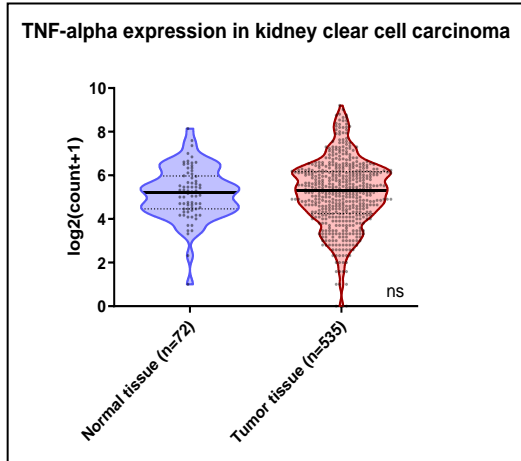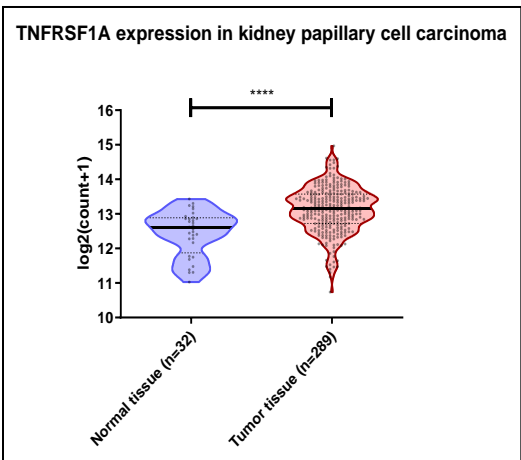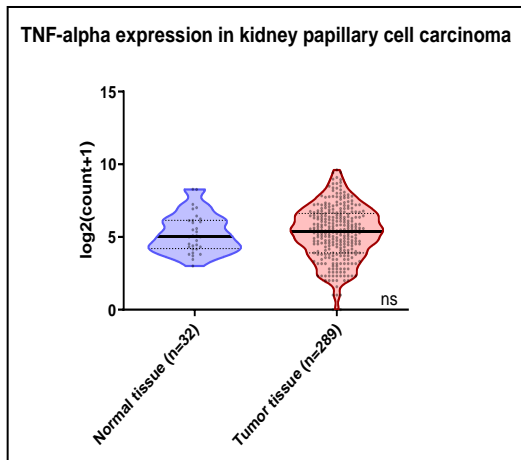

# TNFRSF1A and TNF-alpha expression in cancer (TCGA samples)

- Compatible expression pattern with the proposal for the ligand (↘), but not for receptor (↘ or not statistically significant)

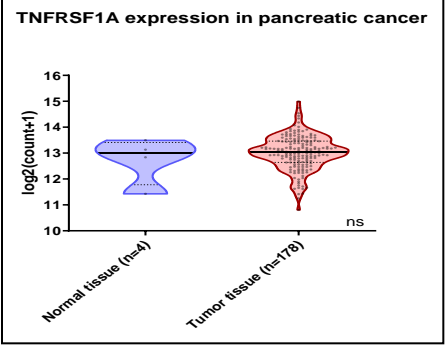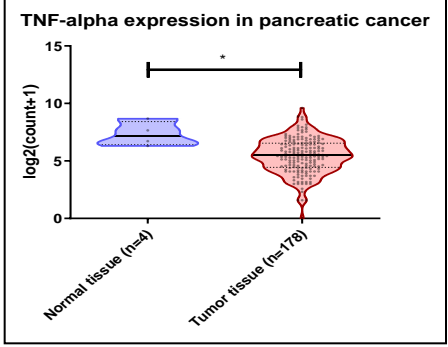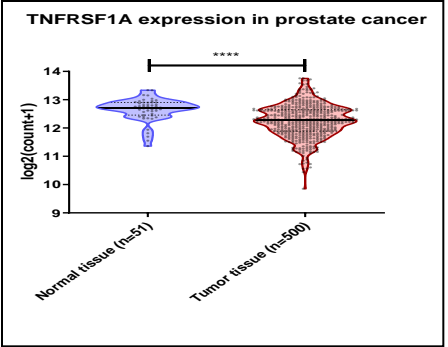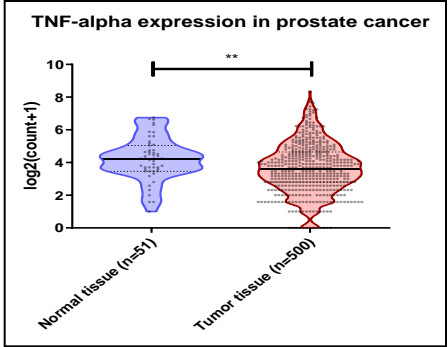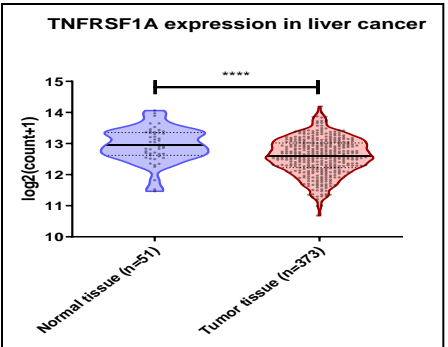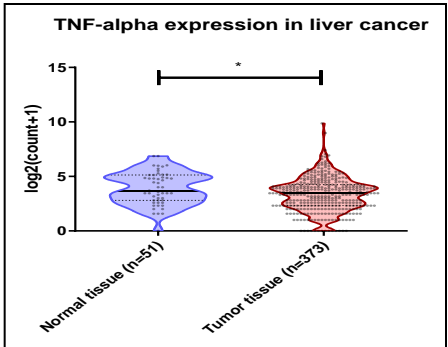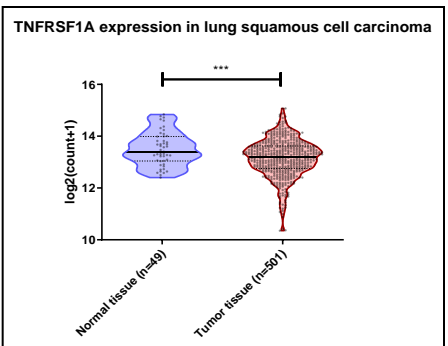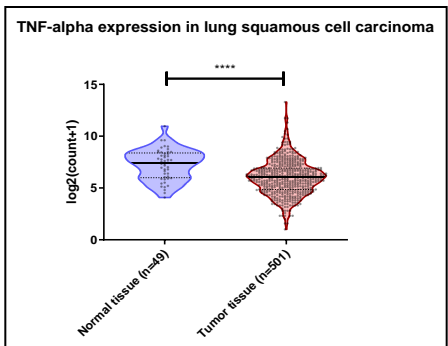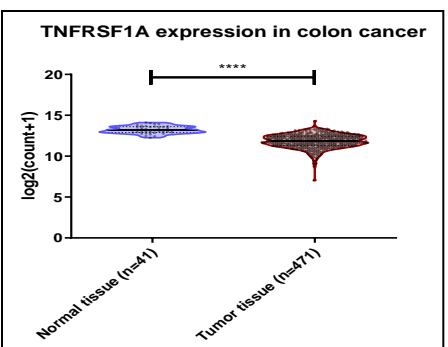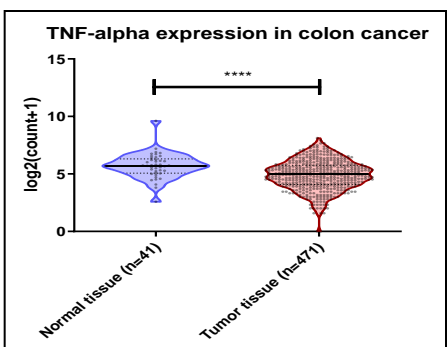

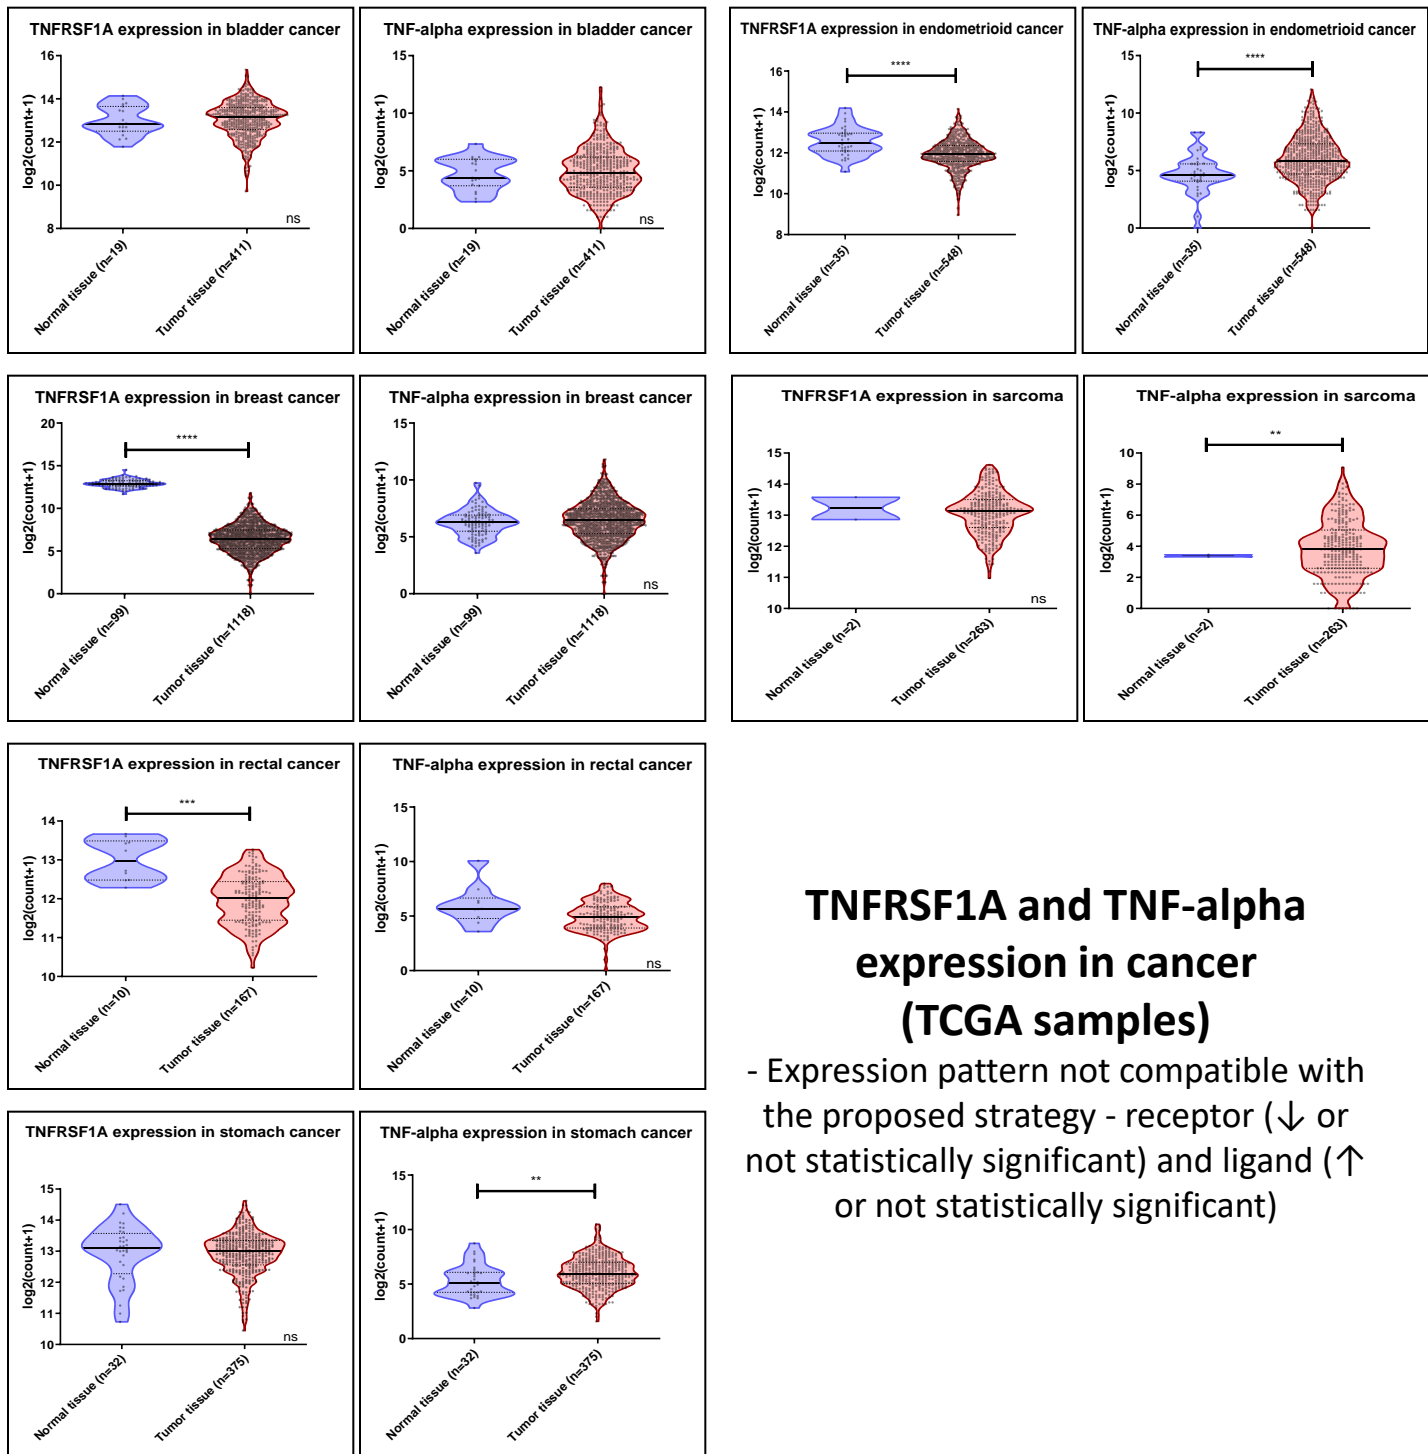

## TNFRSF1A and TNF-alpha expression in cancer (TCGA samples)

- Expression pattern not compatible with the proposed strategy - receptor (↓ or not statistically significant) and ligand (↑ or not statistically significant)
